# Supplementary material
Source: Research Square preprint supplement (doi:10.21203/rs.3.rs-9659638/v1)
Supplement: Supplementary file 2 [file d84c1319384d35b57fefbed4.docx]

Supplementary Materials for

**Hybrid Bacterial Membrane Nanovaccine Reprograms the Tuberculosis Immune Microenvironment via CD40 to Surpass BCG Protection**

Haoran Li *et al*.

Corresponding author: Yu pang, Guangjun Nie, Shanshan Li

**The PDF file includes:**

Materials and Methods

Figs. S1 to S4

**Materials and Methods**

**Materials**

Poly (lactide-co-glycolic acid)-OH (75:25, Relative molecular mass [Mr] 20,000 Da) was purchased from Jinandaigang Biotechnology Company (Beijing, China). Lysozyme, Fluorescein diacetate, Dio, Dil and anti-mouse CD40 antibody were purchased from MedChemExpress (Beijing, China). Phosphate buffered saline (PBS), Dulbecco's Modified Eagle Medium (DMEM), Roswell Park Memorial Institute 1640 (RPMI 1640) medium, fetal bovine serum (FBS) and BCA protein assay kit were purchased from Thermo Fisher Scientific (Waltham, USA). Pre-coated ELISA kits for LPS detection were purchased from eBioscience (San Diego, USA). Murine IL-4 and GM-CSF were purchased from ProSpec (Ness-Ziona, Israel). ELISA kits for IL-6, TNF-α, IL-1β, IL-12p70 and IFN-γ analysis were obtained from R&D Systems (Minnesota, USA). Mouse antibodies against FITC-CD11c, PE-CD80, APC-CD86, FITC-CD11b, RB705-CD3e, APC-CD4, APC-Cy7-CD8a, PE-Cy7-CD44, FITC-CD62L, BV786-IFN-γ, BV421-IL-2, BV650-TNF-α, PE-Ki-67, PE-CD25, BV605-CD69, PE-CD40 and Transcription Factor Buffer Set were purchased from BD biosciences (New Jersey, USA). The pre-coated ELISPOT kits for IFN-γ were purchased from Mabtech AB (Stockholm, Sweden). The Cytometric Bead Array (CBA) Mouse Th1/Th2/Th17 Cytokine Kit was purchased from BD biosciences (New Jersey, USA). The naive CD4+ T cell isolation kit and CD11c Micro Bead Ultra Pure kit were purchased from Miltenyi Biotec (Cologne, USA). Other chemicals were purchased from Sigma-Aldrich (Saint Louis, USA) unless otherwise noted.

**Cell lines and animals**

Murine THP1 cells was purchased from the American Type Culture Collection [(ATCC), Manassas, USA], and cultured in RPMI 1640 medium containing 10% FBS, 2.5 g/L glucose and 0.11 g/L sodium pyruvate. All cells were incubated at 37°C in a 5% CO2 atmosphere.

Female C57BL/6 mice were purchased from Vital River Laboratory Animal Technology Co. Ltd (Beijing, China) and maintained under pathogen free conditions. All animal experiments were conducted under guidelines approved by the Institutional Animal Care and Use Committee (IACUC) of Beijing chest hospital.

**Isolation of cytoplasmic membranes derived from *E. coli***

Cytoplasmic membranes from *E. coli* strain DH5α were isolated as described previously, with some modifications. Briefly, freeze-preserved *E. coli* DH5α cells were cultured in liquid LB medium at 37°C with shaking at 200 rpm overnight. Upon reaching an OD600 of 1.2, the bacteria were collected by centrifugation (3000 ×g, 20 min, 4°C) and washed 3 times with PBS. The cell pellet was resuspended in 10 mL buffer A (1 M sucrose, 0.2 M Tris-HCl, pH 8.0). Lysozyme was then added to a final concentration of 2 mg/mL and the cells were incubated at 37°C for 1 hour with shaking at 120 rpm. Sterile water (90 mL) supplemented with DNase (10 μg/mL) was added and the tube was gently mixed 20 times. Spheroplasts were collected by centrifugation at 3000×g for 20 min at 4°C and resuspended in 10 mL ice-cold buffer B (20 mM Tris-HCl, pH 7.2, 50 mM NaCl, 5 mM EDTA) containing 20% w/v sucrose to lyse the cells. The lysate was clarified of cell debris by centrifugation at 10,000×g for 30 min at 4°C. Samples (5 mL) of the supernatant were placed on top of a discontinuous sucrose gradient (bottom to top: 10 mL at 50%, 5 mL at 46%, 10 mL at 42%, 10 mL at 36%, 5 mL at 32% and 10 mL at 27%) and centrifuged at 113,000 ×g for 2 hours at 4°C using a 70Ti rotor in a Beckman Optima XPN-100 Ultracentrifuge (Brea, CA, USA). Subsequently, 1.5 mL of the cytoplasmic membrane-containing fraction was extracted and diluted with ice-cold buffer B to lower the sucrose concentration to 10% (w/v). The membranes were collected by centrifugation at 113,000×g for 1 hour at 4°C, resuspended in PBS and stored at -80°C for subsequent experiments. The protein concentration of the final membrane preparation was quantified using the BCA protein assay kit.

**Isolation of cytoplasmic membranes derived from Mtb**

To isolate cell membranes from MTB), bacterial cultures (OD₆₀₀ = 0.9) were harvested by centrifugation at 4,000×g for 10 min. The cell pellet was washed, adjusted to OD₆₀₀ =1.6 in sterile 1xPBS, and pelleted again under the same conditions. For protoplast preparation, the cells were resuspended in 15 mL pretreatment buffer (10 mM EDTA-2Na and 0.1% β-mercaptoethanol in 1 ×PBS) and incubated at 37°C with shaking (200 rpm) for 2h. The cells were then collected (4,000 × g, 10 min), washed with 20 mL sterile 1×PBS, and subjected to enzymatic digestion with lysozyme (20 mg/mL, 12.5 mL) at 37°C and 200 rpm for 16 h. The resulting protoplasts were collected by centrifugation at 3,500 × g for 10 min and resuspended in 20 mL sterile 1×PBS. For membrane extraction, the protoplast suspension was incubated with an equal volume of freshly prepared extraction buffer containing 2% Triton X-100, 50 mM Tris-HCl (pH 8.0), 10 mM MgCl₂, and 10 μg/mL DNase I, followed by incubation on ice for 30 min. The mixture was centrifuged at 4°C for 5 min, and the supernatant was carefully collected without disturbing the underlying pellet. The lysate was further clarified by centrifugation at 10,000 × g for 30 min at 4°C. The supernatant (5 mL) was layered onto a discontinuous sucrose gradient (50%, 46%, 42%, 36%, 32%, and 27%, from bottom to top) and ultracentrifuged at 113,000 × g for 2 h at 4°C using a 70Ti rotor. The cytoplasmic membrane fraction (~1.5 mL) was recovered and diluted with ice-cold extraction buffer to reduce the sucrose concentration to 10% (w/v). Membranes were pelleted by ultracentrifugation at 113,000 × g for 1 h at 4°C, resuspended in PBS, and stored at −80°C.The protein concentration of the membrane preparation was determined using a BCA protein assay kit.

**Generation and physicochemical characterization of ME-NPs**

To prepare the ME vesicles, mixed EM and MM were gently shaken using a dry bath incubator at 37°C for 15 min before membrane fusion. ME vesicles were formed by repeated physical extrusion through a 400 nm cut-off extruder (Hamilton Company, Reno, Nevada, USA). Poly (lactide-co-glycolic acid)-OH (PLGA) nanoparticles were prepared using the double-emulsion method. Briefly, PLGA was dissolved in dichloromethane at a concentration of 10 mg/mL. Then, 1 mL PLGA solution was mixed with 0.2 mL sterile water. The mixture was emulsified by ultrasonication (25 W) in an ice bath for 3 min, followed by the addition of 2 mL 1% sodium cholate and emulsification by ultrasonication (30 W) in an ice bath for 5 min. The emulsion was added dropwise into 10 mL 0.5% sodium cholate solution and stirred for 30 min at room temperature. After rotary evaporation for 15 min, PLGA NPs were harvested by centrifugation of the emulsion at 10,000×g for 15 min and washing twice in sterile water. To engineer the ME-NPs, PLGA NPs and ME vesicles were again repeatedly co-extruded through a 200 nm cut-off extruder (Hamilton Company) at a polymer-to-membrane protein mass ratio of 5:1.

To examine the morphology of the nanoparticles and vesicles, 10 µL samples were deposited onto carbon-coated copper grids and incubated for 15 min. The residual fluid was absorbed using filter paper, and the samples on the grids were negatively stained with 1% (v/v) uranyl acetate for 8 min and air dried for analysis with a transmission electron microscope (HT7700, HITACHI, Tokyo, Japan). The hydrodynamic size distribution, ζ potential and polydispersity index (PDI) were measured using a Zetasizer Nano ZS dynamic light scattering instrument (Malvern, UK). A similar preparation method was used to generate EM-NPs and TM-NPs.

**Supplementary Figures**

**
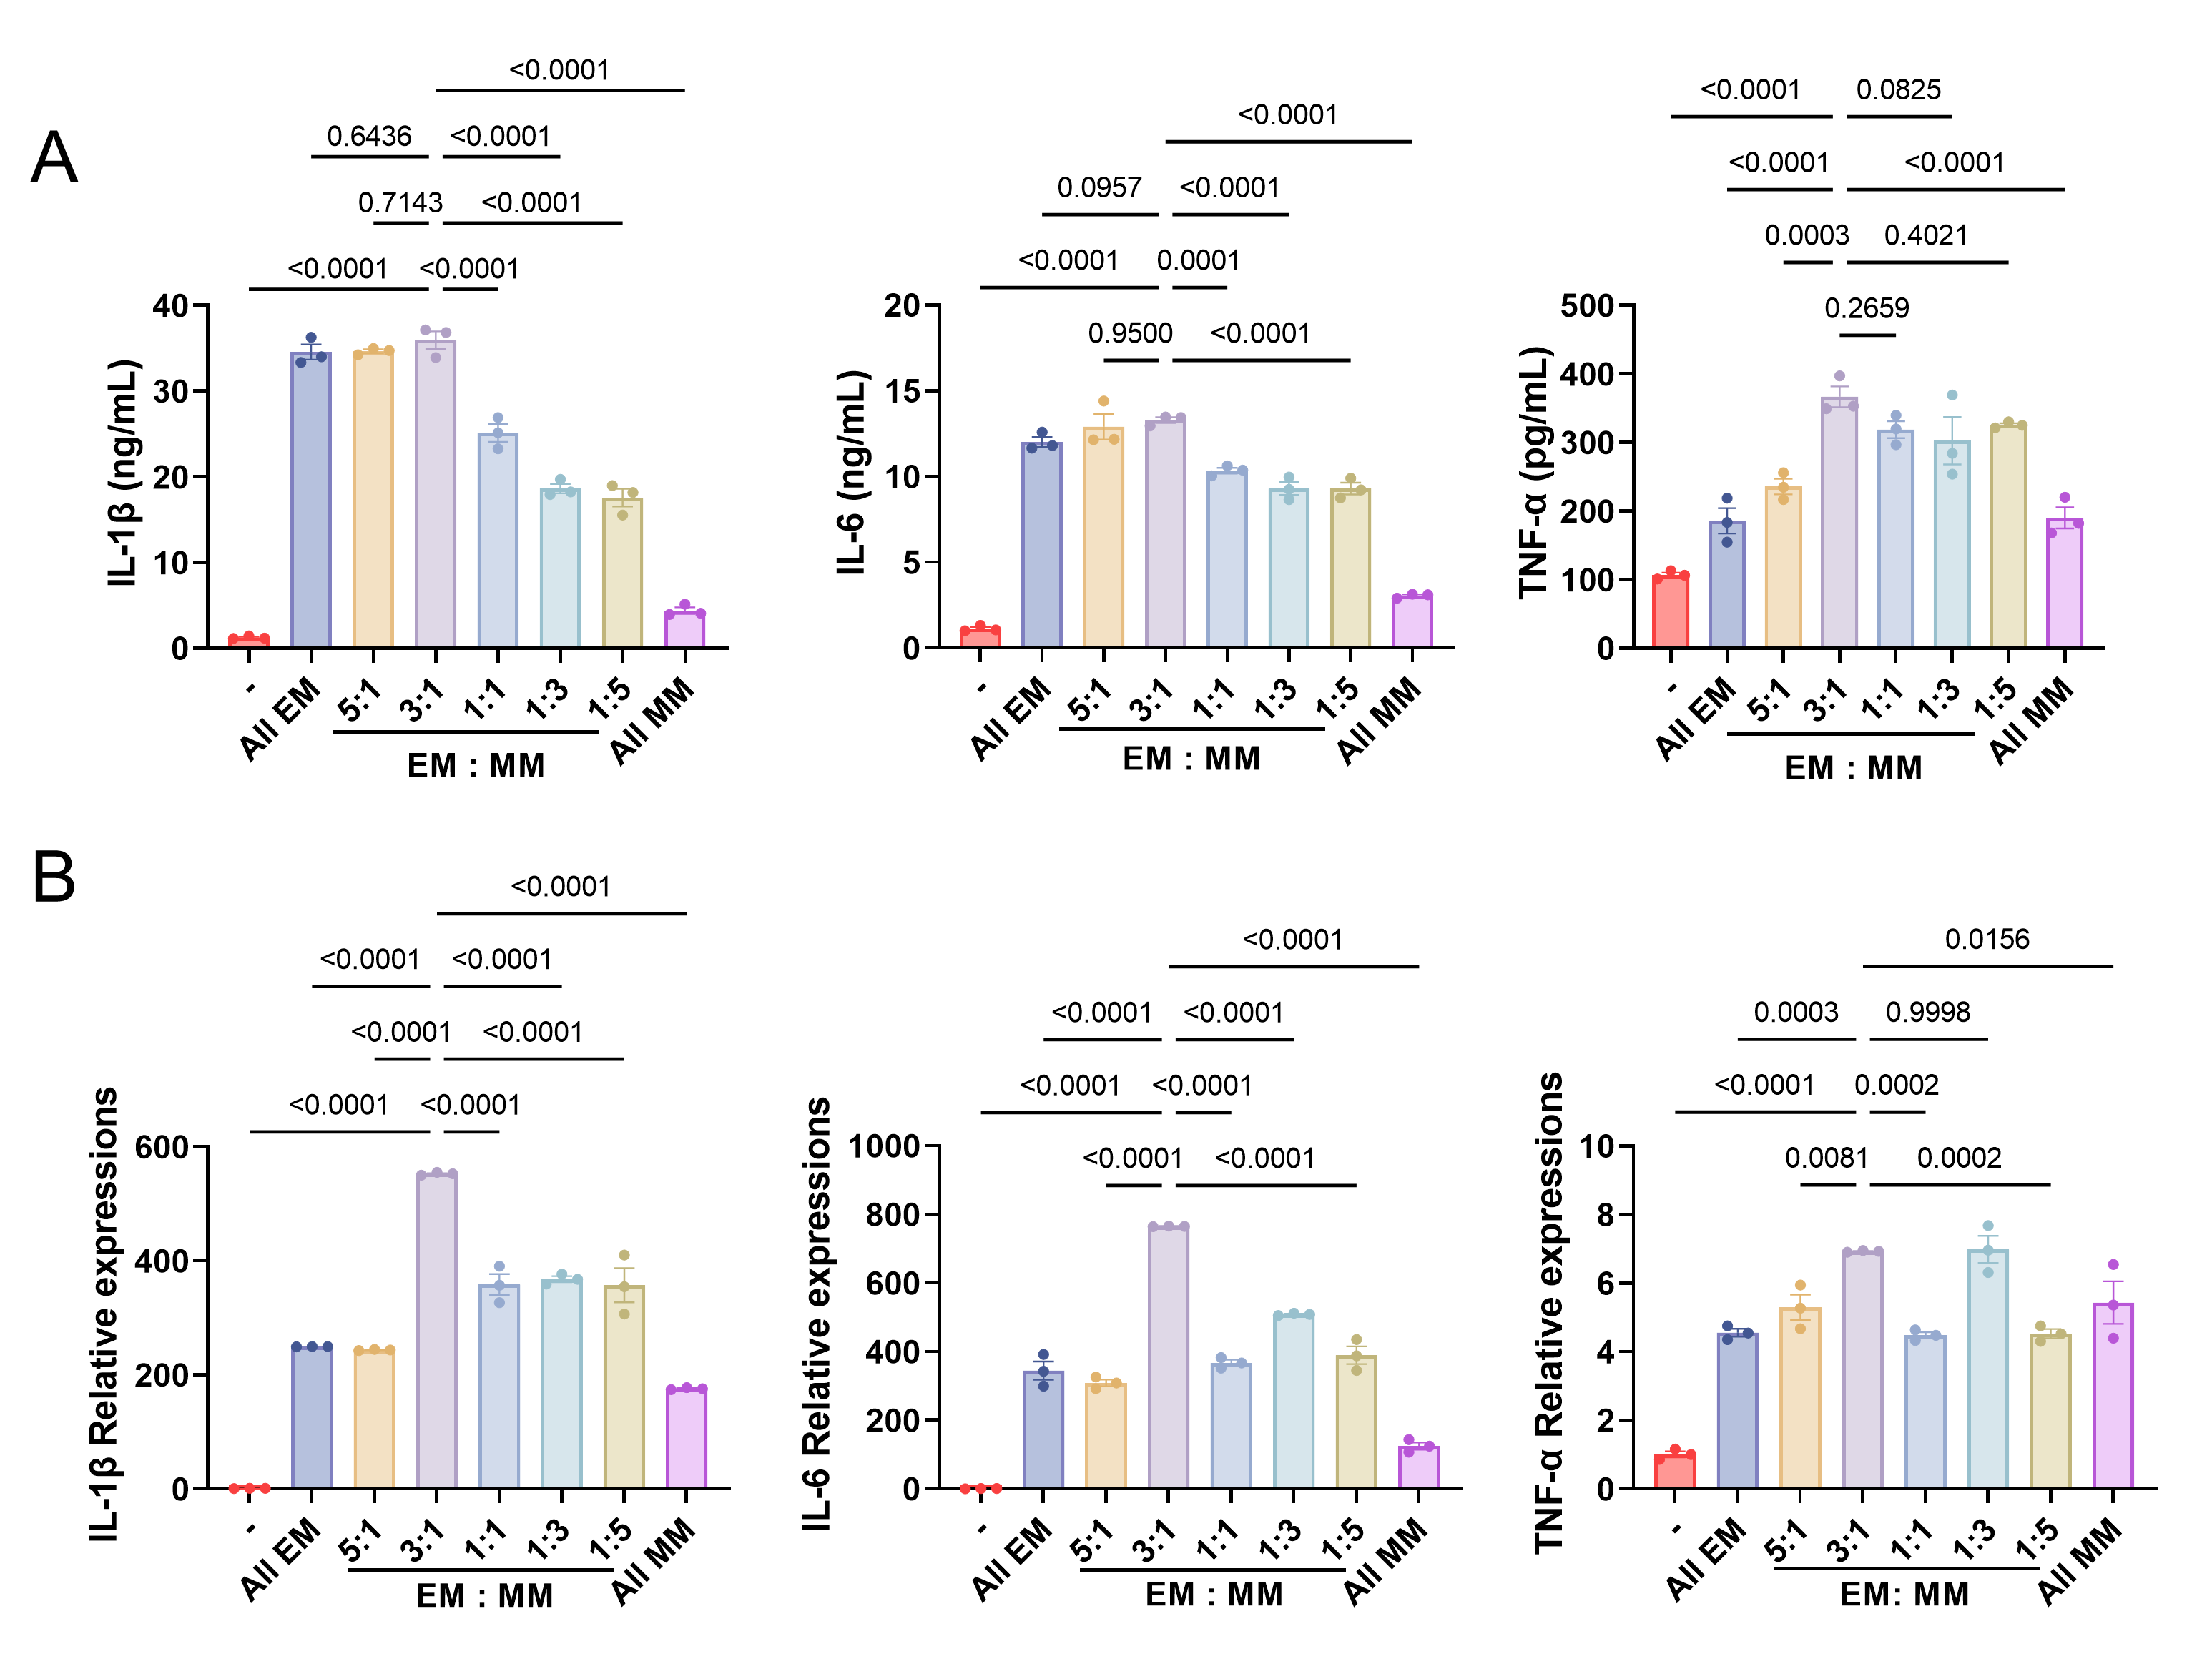
**

**Fig. S1. The concentrations of pro-inflammatory cytokines in BMDC after incubation with the indicated membrane protein mass ratios of EM to TM (EM: MM, 1:0, 5:1, 3:1, 1:1, 1:3, 1:5 and 0:1) for 24 hours.** (A) The production of IL-1β, IL-6, and TNF-α were analyzed using corresponding specific ELISA kits. (B) The gene level of IL-1β, IL-6, and TNF-α were analyzed using q-PRC. n = 3 biologically independent replicates. The data are presented as the means SD. Statistical significance was calculated by one-way ANOVA , **P*<0.05, ***P*<0.01, ****P*<0.001, *****P*<0.0001.

**

**

**Fig. S2. Morphological characterization and physicochemical stability of ME-NPs .** (A) A representative TEM image of a single ME-NP. (B) ME-NPs core size [diameter, red arrows in (A)] and the outer shell thickness [yellow arrows in (A)] based on TEM statistics (n = 25 nanoparticles). (C) Particle size and charge of EM-NPs, MM-NPs and ME-NPs in PBS at 4°C over different time intervals. (D) Physicochemical stability of HM-NPs before lyophilization and after reconstitution in PBS. Data are mean ± SD (n = 3).


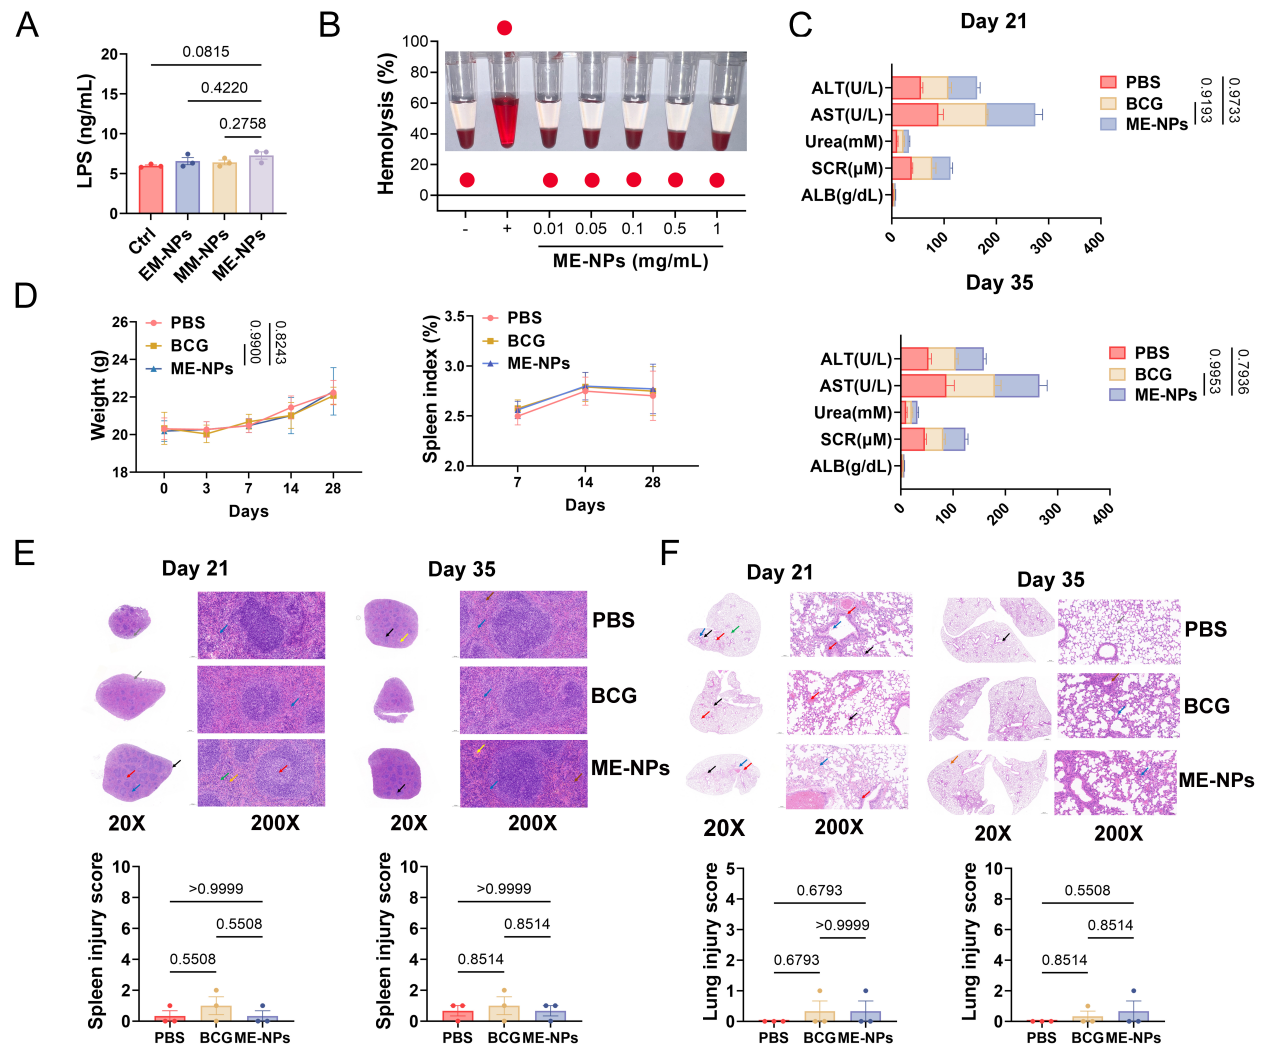


**Fig. S3. Biosafety evaluation of ME-NPs.** (A) Endotoxin levels were quantified. (B) Hemolysis rates were measured at the indicated concentrations. (C) Serum biochemical markers for liver (ALT, AST) and kidney (Urea, SCR) function were measured. (D) Body weight and spleen index of mice were recorded following immunization. (E) H&E staining of spleen and lung tissues was performed. Data are mean ± SD.





**Figure S4. Immunization schedule screening.** (A) Diagram of the three prime–boost intervals tested. (B-C) Frequencies of splenic T cell subsets (CD3+, CD4+) were determined by flow cytometryed. (D-E) Number of IFN-γ spot-forming cells among splenocytes stimulated with Mtb lysate. Data are mean ± SD.
